# Supplementary material for: Aberrant (pro)renin receptor expression induces genomic instability in pancreatic ductal adenocarcinoma through upregulation of SMARCA5/SNF2H
Source: PubMed Central journal article supplement (PMC7695732; doi:10.1038/s42003-020-01434-x), 2020-11-27
Supplement: 42003_2020_1434_MOESM3_ESM.pdf [file 42003_2020_1434_MOESM3_ESM.pdf]

## **Description of Additional Supplementary Files**

File Name: Supplementary Data 1

Description: The number of somatic mutations and SVs in either Mock-or (P)RR-expressing cells.

File Name: Supplementary Data 2

Description: The detailed information of somatic mutations in either Mock-or (P)RR-expressing cells.

File Name: Supplementary Data 3

Description: The detailed information of SVs in either Mock-or (P)RR-expressing cells.

File Name: Supplementary Data 4

Description: The detailed information of LC-MS/MS.

File Name: Supplementary Data 5

Description: The information of primers, antibodies, siRNAs and cell lines.
